# Supplementary material for: Design and fabrication of polypyrrole/expanded graphite 3D interlayer nanohybrids towards high capacitive performance
Source: Royal Society of Chemistry journal article supplement (doi:10.1039/c9ra04205a), 2019-01-01
Supplement: c9ra04205a1.pdf [file c9ra04205a1.pdf]

## Electronic Supplementary Information

# Design and fabrication of polypyrrole/expanded graphite 3D interlayers nanohybrids towards highly capacitive performance

Jue Wang,<sup>ab</sup> Dong Fu,<sup>a</sup> Binqiao Ren,<sup>a</sup> Ping Yu,<sup>a</sup> Xiaochen Zhang,<sup>a</sup> Weijun Zhang<sup>a</sup> and Kan Kan<sup>\*ab</sup>

<sup>a</sup> Heilongjiang Academy of Sciences Institute of Advanced Technology, Harbin 150020, China.

<sup>b</sup> Key Laboratory of Functional Inorganic Material Chemistry Ministry of Education of the People's Republic of China, Heilongjiang University, Harbin 150080, China.

E-mail: kankan.has@foxmail.com

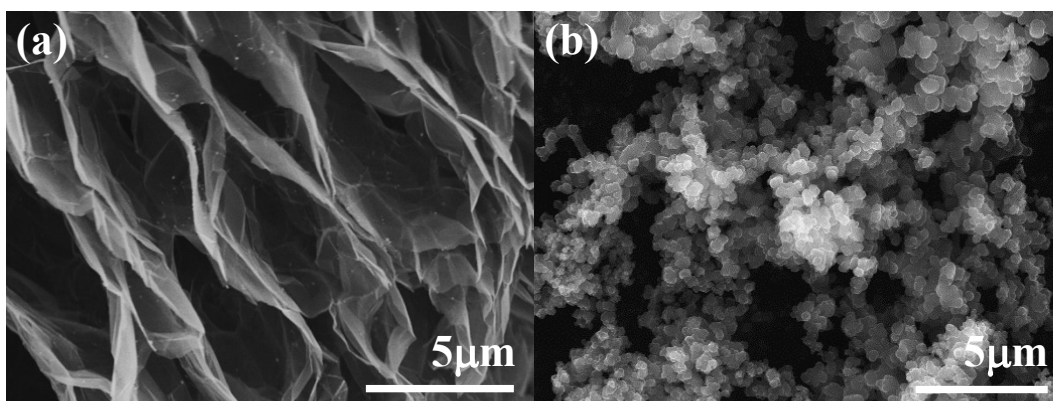

**Fig. S1** The SEM images of (a) EG and (b) PPy

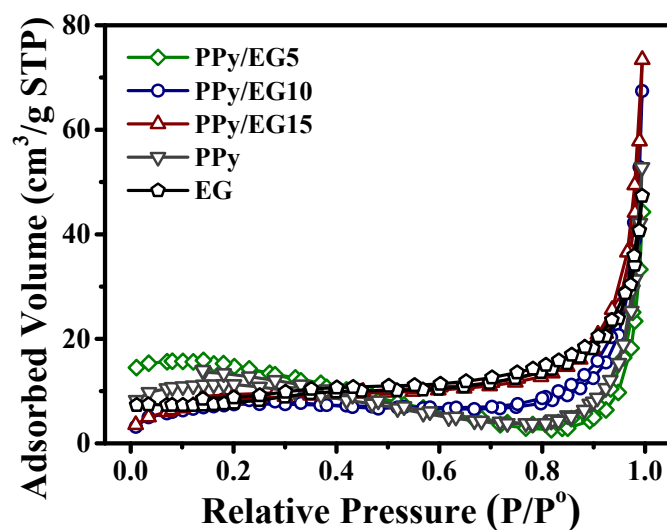

**Fig. S2** N<sub>2</sub> adsorption-desorption isotherms of EG, PPy, PPy/EG15, PPy/EG10 and PPy/EG5 samples

**Table S1** The specific surface area of EG, PPy, PPy/EG15, PPy/EG10 and PPy/EG5 samples

| Sample   | $S_{\text{BET}}$ (m <sup>2</sup> g <sup>-1</sup> ) |
|----------|----------------------------------------------------|
| PPy      | 15.8                                               |
| PPy/EG5  | 22.5                                               |
| PPy/EG10 | 28.7                                               |
| PPy/EG15 | 30.9                                               |
| EG       | 26.3                                               |

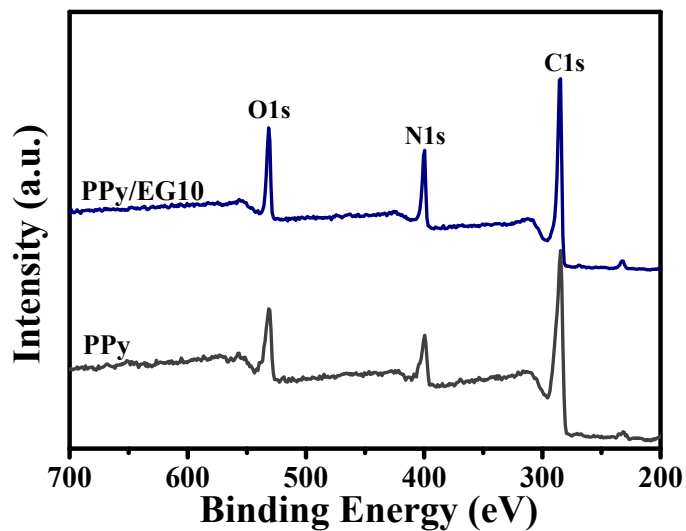

**Fig. S3** XPS full-scan spectra of PPy and PPy/EG10 samples

**Table S2** Elemental composition of the EG, PPy and PPy/EG10 samples

| Sample   | C1s(at.%) | O1s(at.%) | N1s(at.%) |
|----------|-----------|-----------|-----------|
| PPy      | 71.89     | 12.49     | 15.62     |
| EG       | 97.26     | 2.48      | 0.27      |
| PPy/EG10 | 76.90     | 11.18     | 11.92     |

**Table S3** The calculated values of  $R_s$ ,  $R_{ct}$ ,  $Z_w$ ,  $C_{dl}$  and  $C_{ps}$  through CNLS fitting of the experimental impedance spectra based on the proposed equivalent circuit displayed in Fig. 6a

| Samples  | $R_s$<br>( $\Omega \text{ cm}^{-2}$ ) | $R_{ct}$<br>( $\Omega \text{ cm}^{-2}$ ) | $Z_w$<br>( $\Omega \text{ cm}^{-2}$ ) | $C_{dl}$<br>( $\mu\text{F cm}^{-2}$ ) | $C_{ps}$<br>( $\text{mF cm}^{-2}$ ) |
|----------|---------------------------------------|------------------------------------------|---------------------------------------|---------------------------------------|-------------------------------------|
| EG       | 0.5516                                | 0.071                                    | 0.1215                                | 145.5                                 | 0.7768                              |
| PPy/EG5  | 0.5365                                | 1.908                                    | 0.0614                                | 20.94                                 | 1543                                |
| PPy/EG10 | 0.3699                                | 1.839                                    | 0.1249                                | 35.18                                 | 2839                                |
| PPy/EG15 | 0.8563                                | 1.464                                    | 0.1904                                | 23.04                                 | 1680                                |
| PPy      | 0.8665                                | 2.944                                    | 0.1177                                | 34.64                                 | 3254                                |

**Table S4** The calculated values of  $R_s$ ,  $R_{ct}$ ,  $Z_w$ ,  $C_{dl}$  and  $C_{ps}$  through CNLS fitting of the experimental impedance spectra based on the proposed equivalent circuit displayed in Fig. 7a

| Samples  | $R_s$<br>( $\Omega \text{ cm}^{-2}$ ) | $R_{ct}$<br>( $\Omega \text{ cm}^{-2}$ ) | $Z_w$<br>( $\Omega \text{ cm}^{-2}$ ) | $C_{dl}$<br>( $\mu\text{F cm}^{-2}$ ) | $C_{ps}$<br>( $\text{mF cm}^{-2}$ ) |
|----------|---------------------------------------|------------------------------------------|---------------------------------------|---------------------------------------|-------------------------------------|
| EG       | 1.201                                 | 0.257                                    | 0.2211                                | 478.7                                 | 43.7                                |
| PPy/EG5  | 1.058                                 | 2.847                                    | 0.2526                                | 22.23                                 | 1532                                |
| PPy/EG10 | 1.008                                 | 1.926                                    | 0.2461                                | 30.84                                 | 2353                                |
| PPy/EG15 | 1.251                                 | 1.653                                    | 0.1883                                | 25.49                                 | 1230                                |
| PPy      | 1.047                                 | 2.352                                    | 0.1373                                | 19.64                                 | 3441                                |

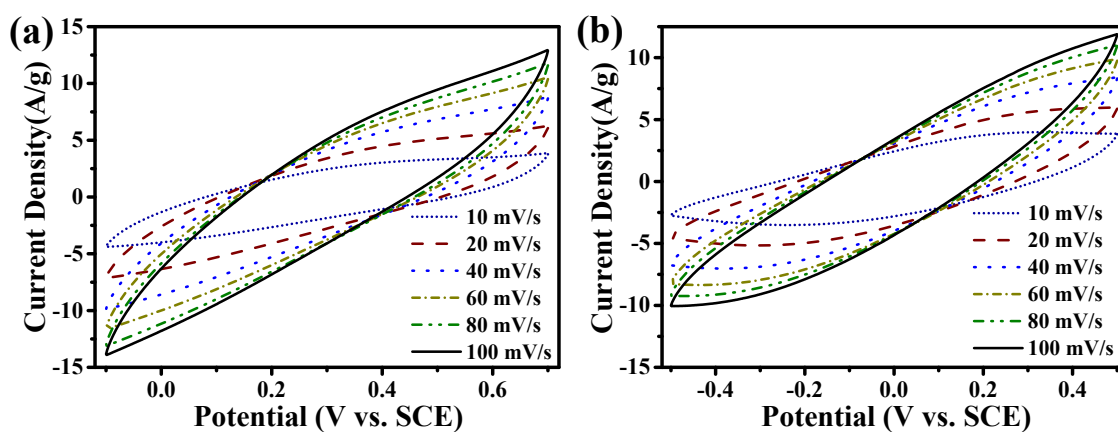

**Fig. S4.** The CV curves of PPy/EG10 electrode at the scan rate from 10~100  $\text{mV s}^{-1}$  in (a) 1 M  $\text{H}_2\text{SO}_4$  and (b) 1 M KCl electrolytes

**Table S5** The electrochemical properties of EG, PPy, PPy/EG15, PPy/EG10 and PPy/EG5 samples

| Sample   | 1 M $\text{H}_2\text{SO}_4$ electrolyte |                        |                              | 1 M KCl electrolyte            |                        |                              |
|----------|-----------------------------------------|------------------------|------------------------------|--------------------------------|------------------------|------------------------------|
|          | $C_g$<br>( $\text{F g}^{-1}$ )          | Rate Capability<br>(%) | Capacitance Retention<br>(%) | $C_g$<br>( $\text{F g}^{-1}$ ) | Rate Capability<br>(%) | Capacitance Retention<br>(%) |
| PPy      | 293.6                                   | 33.8%                  | 67.6%                        | 266.9                          | 33.4%                  | 69.4%                        |
| PPy/EG5  | 376.4                                   | 54.7%                  | ---                          | 353.6                          | 55.1%                  | ---                          |
| PPy/EG10 | 454.3                                   | 75.9%                  | 83.9%                        | 442.7                          | 73.3%                  | 86.3%                        |
| PPy/EG15 | 402.5                                   | 78.4%                  | ---                          | 399.8                          | 76.2%                  | --                           |
| EG       | 49.6                                    | 52.7%                  | 95.9%                        | 42.2                           | 51.3%                  | 96.8%                        |

**Table S6** Specific capacitance of different carbon based PPy nanohybrids in three-electrode system

| Material                      | Electrolyte                        | Current density<br>(A g <sup>-1</sup> ) | Specific capacitance<br>(F g <sup>-1</sup> ) | Ref.      |
|-------------------------------|------------------------------------|-----------------------------------------|----------------------------------------------|-----------|
| Graphene/PPy nanotube aerogel | 1 M H <sub>2</sub> SO <sub>4</sub> | 0.5                                     | 253                                          | [13]      |
| PPy/sulfonated graphene       | 1 M H <sub>2</sub> SO <sub>4</sub> | 0.3                                     | 310                                          | [14]      |
| Cellulose carbon aerogel/PPy  | 1 M H <sub>2</sub> SO <sub>4</sub> | 0.5                                     | 387.6                                        | [57]      |
| PPy/modified GO               | 2 M NaNO <sub>3</sub>              | 1.0                                     | 202                                          | [15]      |
| Activated Carbons/PPy         | 1M Na <sub>2</sub> SO <sub>4</sub> | 1.0                                     | 82.3                                         | [24]      |
| rGO/PPy aerogel               | 6 M KOH                            | 0.5                                     | 304                                          | [36]      |
| PPy/EG                        | 1 M H <sub>2</sub> SO <sub>4</sub> | 1.0                                     | 454.3                                        | This work |
|                               | 1 M KCl                            | 1.0                                     | 442.7                                        |           |

**Table S7** Specific capacitance, power density and energy density of different carbon based PPy nanohybrids in two symmetric electrode system

| Material                       | Electrolyte                                 | Current density<br>(A g <sup>-1</sup> ) | Specific capacitance<br>(F g <sup>-1</sup> ) | Power density<br>(kW kg <sup>-1</sup> ) | Energy density<br>(Wh kg <sup>-1</sup> ) | Ref.         |
|--------------------------------|---------------------------------------------|-----------------------------------------|----------------------------------------------|-----------------------------------------|------------------------------------------|--------------|
| PPy/sulfonated graphene        | 1M KCl                                      | 0.3                                     | 253                                          | 0.1089                                  | 4.3                                      | [14]         |
|                                |                                             |                                         |                                              | 3.6                                     | 2.8                                      |              |
| PPy/modified GO                | 2 M NaNO <sub>3</sub>                       | 1.0                                     | 87                                           | 0.825                                   | 10                                       | [15]         |
| Graphene oxide/carbon dots/PPy | 1M LiCl                                     | 0.5                                     | 216.8                                        | 0.25                                    | 30.1                                     | [29]         |
| PPy/EG                         | 1 M<br>Et <sub>4</sub> NBF <sub>4</sub> -PC | 1.0                                     | 342.4                                        | 1.0                                     | 47.5                                     | This<br>work |
|                                |                                             |                                         |                                              | 20                                      | 23.9                                     |              |
